# Supplementary material
Source: PubMed Central journal article supplement (PMC2633549)
Supplement: 0812347106_0812347106SI.pdf [file 0812347106_0812347106SI.pdf]

# Supporting Information

Erdman et al. 10.1073/pnas.0812347106

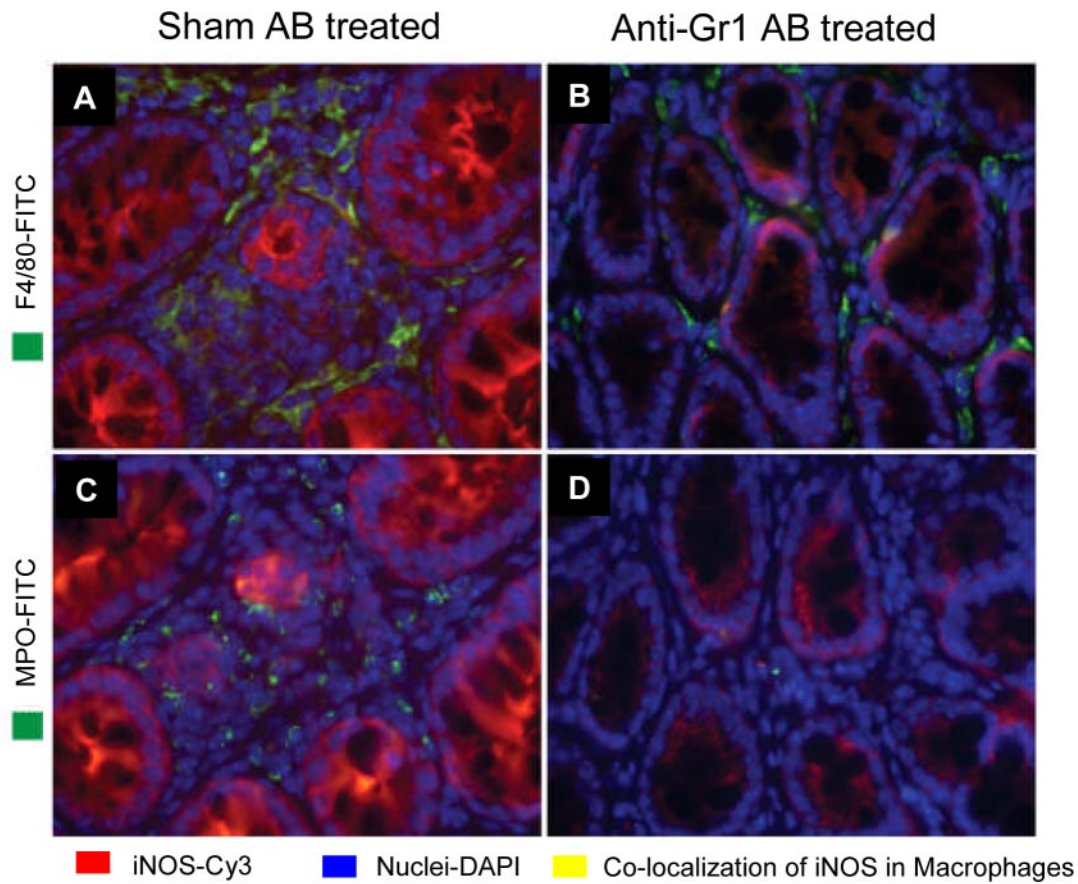

**Fig. S1.** FIHC revealed that iNOS-expressing F4/80<sup>+</sup>, MPO<sup>+</sup> and epithelial cells observed in the colonic mucosa of sham-antibody-treated *H. hepaticus*-infected Rag 2<sup>-/-</sup> control mice (A and C) were significantly reduced after depletion of Gr-1<sup>+</sup> cells (B and D). FITC (green, used for either F4/80<sup>+</sup> macrophages or MPO<sup>+</sup> cells), Cy3 (red, iNOS) and DAPI (blue, DNA/cell nuclei). (Original magnification, 630 $\times$ .)

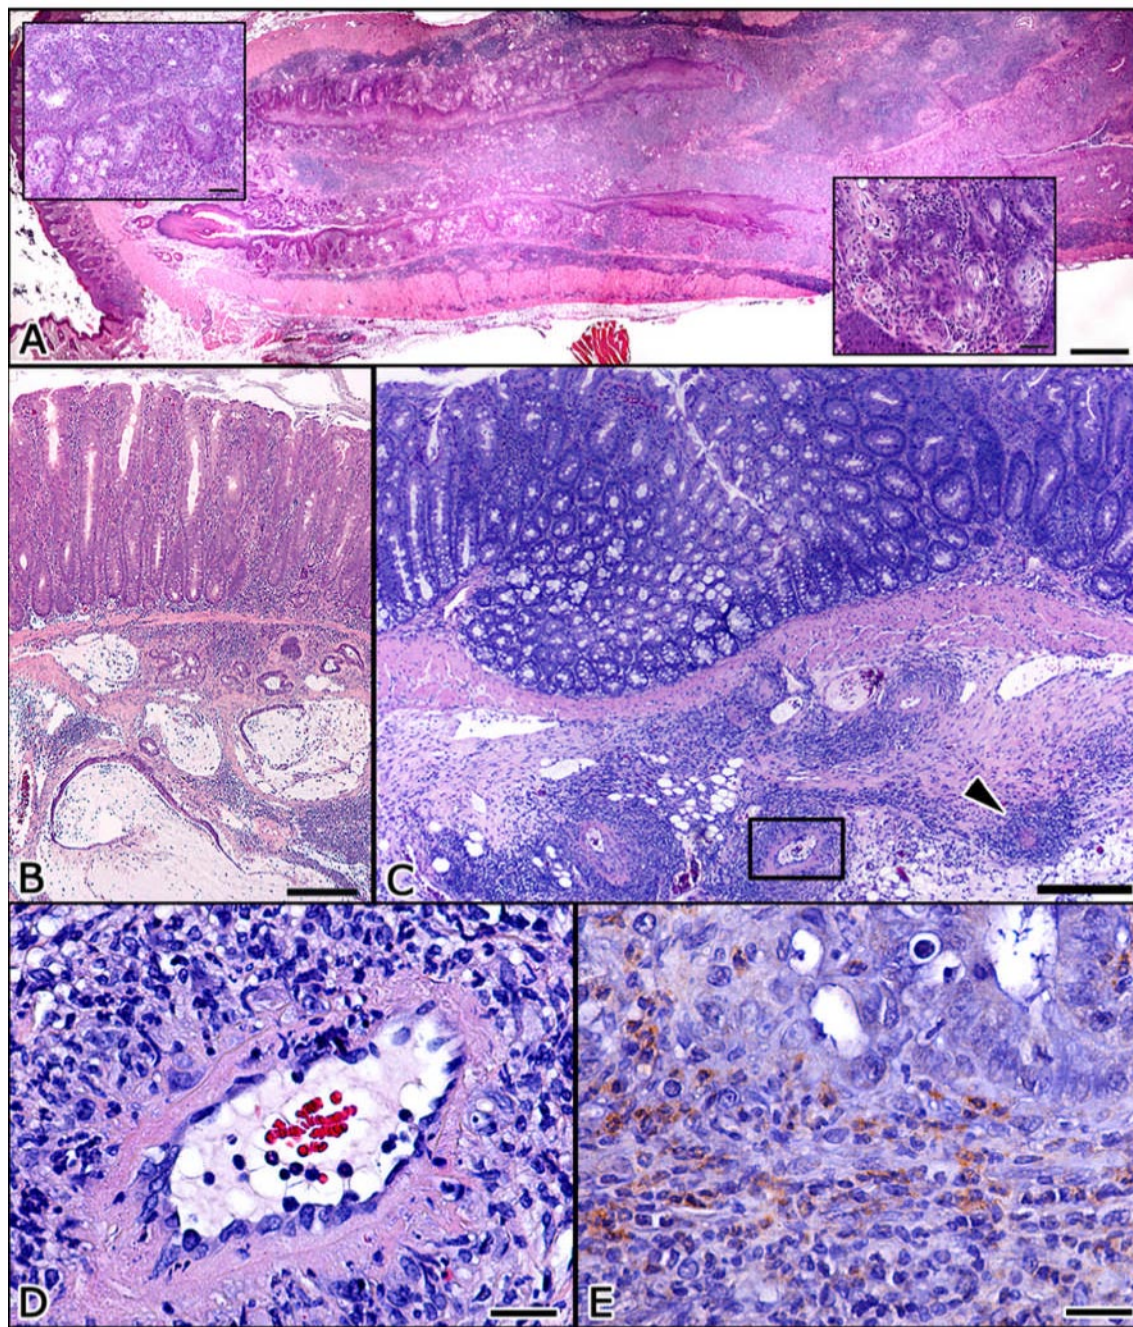

**Fig. S2.** Pathogenic bacterial infection triggers epithelial dysplasia and carcinoma development in the lower bowel of mice. (A) Adenosquamous carcinoma found in a *H. hepaticus*-infected *Rag2*<sup>-/-</sup> mouse that received T<sub>EFF</sub> cells at 3 months after infection. The normal architecture of the descending colon, rectum, and anal region is effaced by a prominent squamous neoplastic component admixed with moderately differentiated typical colon adenocarcinoma glands and a dense inflammatory infiltrate. (Insets) Histomorphology of squamous differentiation of neoplastic epithelium with inflammatory cells. (B) Mucinous adenocarcinoma in the transverse colon was the most common type of colorectal cancer in *H. hepaticus*-infected *Rag2*<sup>-/-</sup> mice undergoing T<sub>EFF</sub> cell transfer. Note neoplastic glands and mucin pools partially lined by abnormal epithelium invading into submucosa and muscle layers and obliterating normal architecture. *Helicobacter*-free *Rag2*<sup>-/-</sup> mice receiving T<sub>EFF</sub> cells did not develop dysplasia or cancer in the lower bowel (Table 1). (C) Characteristic *H. hepaticus*-induced IBD lesions in the ascending colon of an IL10-deficient *Rag2*<sup>-/-</sup> mouse at 3 months after infection showing mucosal inflammation, hyperplasia, and dysplasia of colonic epithelia. The histopathology of the *H. hepaticus*-infected, IL10-deficient *Rag2*<sup>-/-</sup> model of IBD differs from the *H. hepaticus*-infected *Rag2*<sup>-/-</sup> model with increased epithelial hyperplasia and dysplasia in addition to a consistent finding of arteritis nodosa lesions in mice lacking IL10. Arterioles in intestinal serosa, muscularis propria, and mesentery are surrounded by dense inflammatory cell infiltrates. Arrowhead indicates occluded arteriole. (D) The arteriole within the boxed area in C is shown at a higher magnification. A dense perivascular infiltrate of neutrophils and macrophages effaces the adventitia. Note necrosis of the medial smooth muscle cells with multiple figures of karyorrhexis. (E) 7/4-specific immunohistochemistry highlights the increased numbers of neutrophils characterizing *H. hepaticus*-induced colitis in IL10-deficient *Rag2*<sup>-/-</sup> mice. Hematoxylin and eosin (A–D); 3,3-diaminobenzidine, hematoxylin counterstain (E). (Scale Bars: 500  $\mu$ m (A); 250  $\mu$ m (B and C); 100  $\mu$ m (left inset in A); 25  $\mu$ m (D and E, right inset in A).)

**Table S1. Pathogenic enteric bacterial infection and inflammatory factors correlate with colonic epithelial dysplasia**

| Hh | Mutant                                  | Treatment | Colonic inflammation | Colonic dysplasia | Neutrophils<br>7/4 <sup>+</sup> cells | Macrophages F4/80 <sup>+</sup> cells |
|----|-----------------------------------------|-----------|----------------------|-------------------|---------------------------------------|--------------------------------------|
| -  | Rag2 <sup>-/-</sup>                     | -         | 0 (0-0)              | 0 (0-0)           | 3.8 ± 0.61                            | 1.2 ± 0.33                           |
| +  | Rag2 <sup>-/-</sup>                     | -         | 4 (2-4)              | 3 (0-4)           | 28.4 ± 3.33                           | 13.8 ± 1.14                          |
| +  | Rag2 <sup>-/-</sup>                     | anti-Gr-1 | 0 (0-3)              | 0 (0-2)           | 0.4 ± 0.22                            | 6.6 ± 1.18                           |
| +  | Rag2 <sup>-/-</sup>                     | anti-TNF  | 2 (1-2)              | 0 (0-1)           | 18.8 ± 2.86                           | 2.8 ± 0.65                           |
| +  | IL10 <sup>-/-</sup> Rag2 <sup>-/-</sup> | -         | 4 (4-4)              | 3 (3-4)           | 45.2 ± 4.56                           | 18.0 ± 2.04                          |
| +  | WT                                      | -         | 1 (0-2)              | 0 (0-0)           | 8.0 ± 0.87                            | 3.5 ± 0.64                           |

Shown are pathology scores and inflammatory cell counts for select treatment groups. Lesions were graded on a scale of 0-4 with ascending severity. Nonparametric data are presented as median score and range (in parentheses) for each group.

**Table S2. Counts of macrophages and neutrophils (per high-power 40× field image)**

| Infection status | Genotype                                | Other treatment                            | Cell counts (mean ± SE)           |                                 |
|------------------|-----------------------------------------|--------------------------------------------|-----------------------------------|---------------------------------|
|                  |                                         |                                            | Macrophages (F4/80 <sup>+</sup> ) | Neutrophils (7/4 <sup>+</sup> ) |
| –                | WT                                      | –                                          | 1.4 ± 0.43                        | 3.8 ± 0.74                      |
| –                | Rag2 <sup>–/–</sup>                     | –                                          | 1.2 ± 0.33                        | 3.8 ± 0.61                      |
| –                | IL10 <sup>–/–</sup> Rag2 <sup>–/–</sup> | –                                          | 0.9 ± 0.28                        | 4.8 ± 0.47                      |
| –                | IL10 <sup>–/–</sup>                     | –                                          | 12.1 ± 1.23                       | 13.6 ± 1.33                     |
| +                | WT                                      | –                                          | 3.5 ± 0.64                        | 8.0 ± 0.87                      |
| +                | Rag2 <sup>–/–</sup>                     | –                                          | 13.8 ± 1.14                       | 28.4 ± 3.33                     |
| +                | IL10 <sup>–/–</sup> Rag2 <sup>–/–</sup> | –                                          | 18.0 ± 2.04                       | 45.2 ± 4.57                     |
| +                | IL10 <sup>–/–</sup>                     | –                                          | 21.4 ± 2.29                       | 13.6 ± 1.33                     |
| +                | Rag2 <sup>–/–</sup>                     | Sham water                                 | 19.9 ± 1.67                       | 42.8 ± 4.76                     |
| +                | Rag2 <sup>–/–</sup>                     | NMA in water                               | 19.4 ± 0.71                       | 42.9 ± 4.66                     |
| +                | Rag2 <sup>–/–</sup>                     | wt CD4 <sup>+</sup> cells                  | 8.4 ± 1.16                        | 8.5 ± 1.58                      |
| +                | Rag2 <sup>–/–</sup>                     | IL10 <sup>–/–</sup> CD4 <sup>+</sup> cells | 30.4 ± 2.18                       | 31.8 ± 3.59                     |

Cell counts (in situ) of macrophages and neutrophils. Macrophages and neutrophils were identified in intestinal tissue sections with standard avidin-biotin complex (ABC) immunohistochemistry. Rat anti-mouse F4/80 (macrophages) or 7/4 (neutrophils) and biotinylated goat anti-rat IgG (Serotec) were used as primary and secondary antibodies, respectively. Inflammatory cells were quantitated as described in *Materials and Methods*. Cell counts were recorded as the number of macrophages or neutrophils counted per image. The increase of macrophages and neutrophils infiltrating the large bowel mucosa because of infection with *H. hepaticus* was significantly ( $P < 0.05$ ) amplified when infected mice were deficient in lymphocytes or IL10. The adoptive transfer of wild-type CD4-positive lymphocytes down-regulated the frequency of macrophages and neutrophils in the large bowel of Rag2-deficient *H. hepaticus*-infected mice.

**Table S3. Pathology scores (cecum)**

| H. hepaticus     |                                         |                                              | Median score (range) cecum |             |           |
|------------------|-----------------------------------------|----------------------------------------------|----------------------------|-------------|-----------|
| Infection status | Genotype                                | Cell treatment                               | Inflammation               | Hyperplasia | Dysplasia |
| –                | WT                                      | –                                            | 0 (0–0)                    | 0 (0–0)     | 0 (0–0)   |
| –                | Rag2 <sup>-/-</sup>                     | –                                            | 0 (0–0)                    | 0 (0–0)     | 0 (0–0)   |
| –                | Rag2 <sup>-/-</sup>                     | WT T <sub>EFF</sub> cells                    | 0.5 (0–1)                  | 0 (0–0)     | 0 (0–0)   |
| –                | IL10 <sup>-/-</sup> Rag2 <sup>-/-</sup> | –                                            | 1 (0–1)                    | 0 (0–0)     | 0 (0–0)   |
| +                | WT                                      | –                                            | 0.5 (0–2)                  | 0 (0–1)     | 0 (0–0)   |
| +                | Rag2 <sup>-/-</sup>                     | –                                            | 4 (4–4)                    | 4 (3–4)     | 3 (1–4) * |
| +                | Rag2 <sup>-/-</sup>                     | WT CD4 <sup>+</sup> cells                    | 2 (1–3)                    | 0.5 (0–2)   | 0 (0–2)   |
| +                | Rag2 <sup>-/-</sup>                     | WT T <sub>REG</sub> cells                    | 1 (0–4)                    | 0 (0–3)     | 0 (0–1)   |
| +                | Rag2 <sup>-/-</sup>                     | WT T <sub>EFF</sub> cells                    | 4 (4–4)                    | 4 (3–4)     | 4 (3–4) * |
| +                | Rag2 <sup>-/-</sup>                     | WT T <sub>EFF</sub> + T <sub>REG</sub> cells | 0 (0–1)                    | 0 (0–0)     | 0 (0–0)   |
| +                | Rag2 <sup>-/-</sup>                     | IL10 <sup>-/-</sup> CD4 <sup>+</sup> cells   | 4 (4–4)                    | 4 (4–4)     | 3 (3–4) * |
| +                | Rag2 <sup>-/-</sup>                     | IL10-Ig fusion protein                       | 2.5 (1–4)                  | 1.5 (0–4)   | 1.5 (0–3) |
| +                | WT                                      | –                                            | 0 (0–2)                    | 0 (0–0)     | 0 (0–0)   |
| +                | IL10 <sup>-/-</sup>                     | –                                            | 4 (4–4)                    | 4 (4–4)     | 3.5 (3–4) |
| +                | IL10 <sup>-/-</sup> Rag2 <sup>-/-</sup> | –                                            | 4 (3–4)                    | 4 (3–4)     | 3 (2–3) * |

Pathology scores of lower bowel for all treatment groups. Formalin-fixed tissues were embedded in paraffin, cut at 5  $\mu$ m, and stained with hematoxylin and eosin. Lesions were graded on a scale of 0 to 4 with ascending severity as described elsewhere in the text. Nonparametric data are presented as median score and range (in parentheses) for each group. Data were subjected to the Mann–Whitney *U* test for nonparametric data.

\*Significance was set at  $P < 0.05$ . Significant increases in inflammation, hyperplasia, and dysplasia/cancer were observed with deficiency of Rag2<sup>-/-</sup> and IL10. Significant differences were also observed after *H. hepaticus* infection in Rag2<sup>-/-</sup> and Rag2IL10<sup>-/-</sup>, and after adoptive transfer of WT T<sub>EFF</sub> cells. Adoptive transfer of WT T<sub>REG</sub> cells suppressed inflammation-associated carcinogenesis to baseline levels.
